# Supplementary material for: Discovery of Novel Bioactive Tanshinones and Carnosol Analogues against Breast Cancer
Source: MDPI journal article supplement (doi:10.3390/cancers15041318), 2023-02-19
Supplement: s1 [file s1]

## Supplementary Information

# Discovery of novel bioactive tanshinones and carnosol analogues against breast cancer

Miguel A. González-Cardenete <sup>1,\*</sup>, Natalia González-Zapata <sup>1</sup>, Lucinda Boyd <sup>2</sup> and Fatima Rivas <sup>2</sup>

<sup>1</sup> Instituto de Tecnología Química, Universitat Politècnica de València-Consejo Superior de Investigaciones Científicas, Avda. de los Naranjos s/n, 46022 Valencia, Spain

<sup>2</sup> Department of Chemistry, Louisiana State University, 133 Chopping Hall, Baton Rouge, LA 70803, USA

Email: migoncar@itq.upv.es

### Contents

Copies of <sup>1</sup>H NMR, and <sup>13</sup>C NMR spectra for compounds **7-10**:

|                                                               |            |
|---------------------------------------------------------------|------------|
| -Diagrams of cell viability versus concentration.....         | Figure S1  |
| -Normalized therapeutic index and statistical comparison..... | Figure S2  |
| - <sup>1</sup> H NMR spectrum of <b>7</b> .....               | Figure S3  |
| - <sup>13</sup> C NMR spectrum of <b>7</b> .....              | Figure S4  |
| -DEPT135 spectrum of <b>7</b> .....                           | Figure S5  |
| - <sup>1</sup> H NMR spectrum of <b>8</b> .....               | Figure S6  |
| - <sup>13</sup> C NMR spectrum of <b>8</b> .....              | Figure S7  |
| -DEPT135 spectrum of <b>8</b> .....                           | Figure S8  |
| - <sup>1</sup> H NMR spectrum of <b>9</b> .....               | Figure S9  |
| - <sup>13</sup> C NMR spectrum of <b>9</b> .....              | Figure S10 |
| -DEPT135 spectrum of <b>9</b> .....                           | Figure S11 |
| - <sup>1</sup> H NMR spectrum of <b>10</b> .....              | Figure S12 |
| - <sup>13</sup> C NMR spectrum of <b>10</b> .....             | Figure S13 |
| -DEPT135 spectrum of <b>10</b> .....                          | Figure S14 |

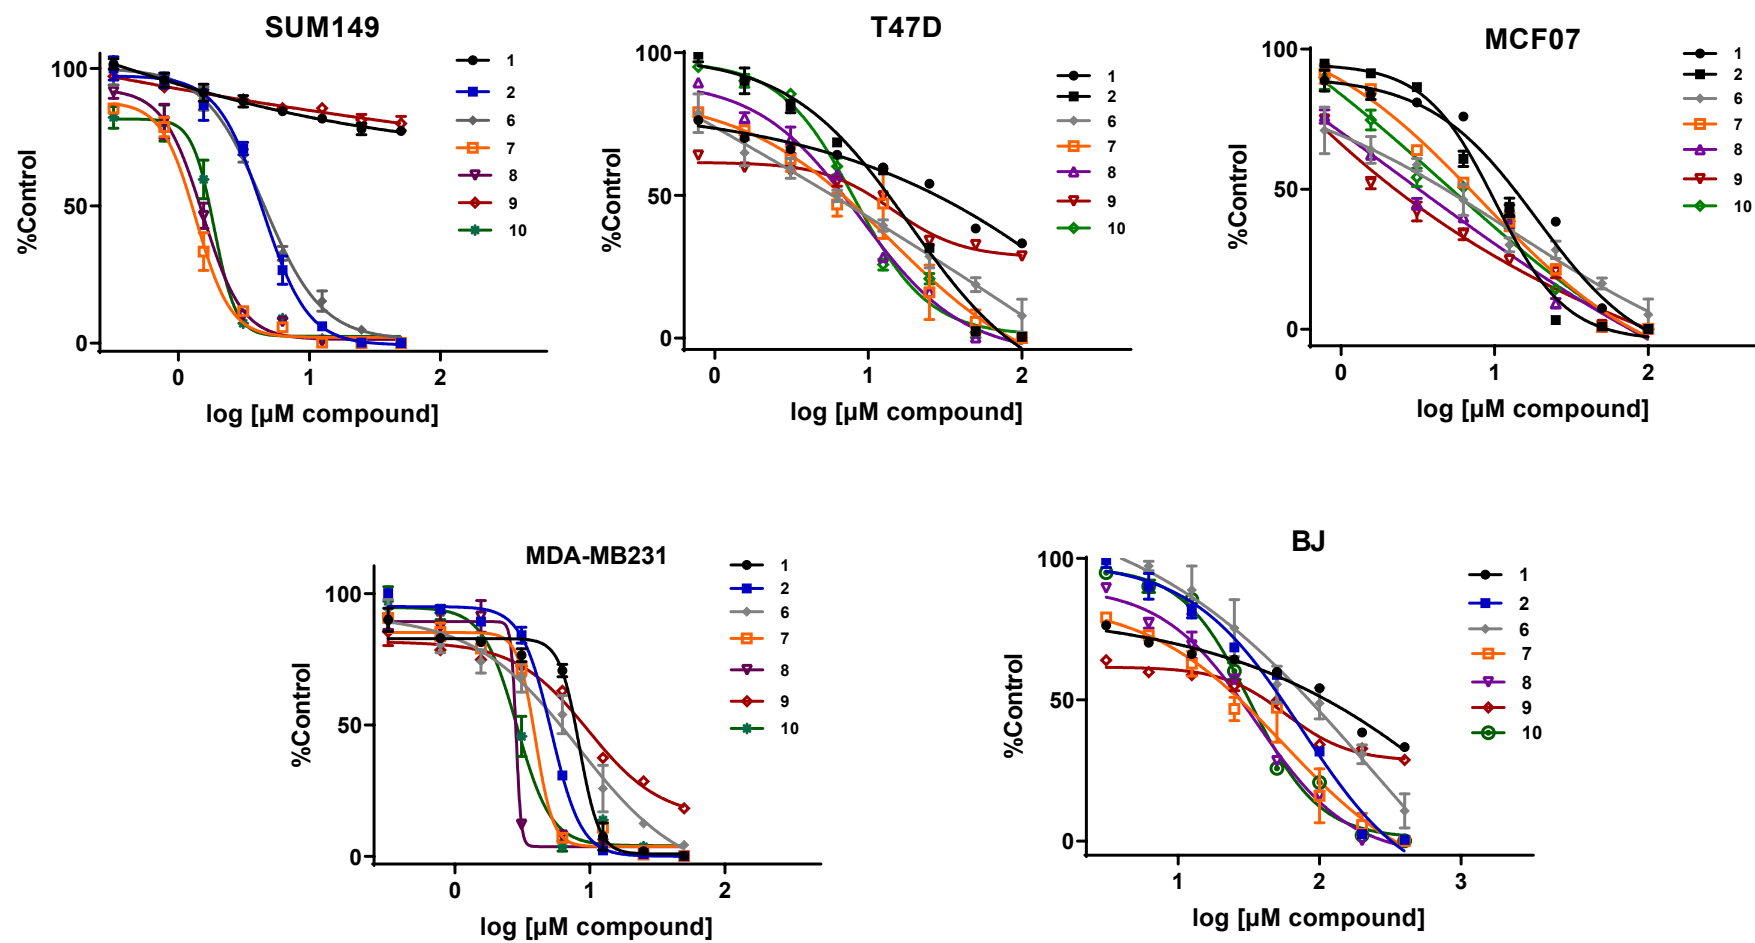

**Figure S1.** Diagrams of cell viability versus concentration.

| SUM149    | MDA-MB231  | T47D       | MCF07       | BJ         | #  |
|-----------|------------|------------|-------------|------------|----|
| >50       | 8.3± 1.4   | >100       | 19.02± 1.5  | >50        | 1  |
| 4.4± 0.27 | 5.1± 0.62  | >50        | 10± 1.50    | 75± 6.2    | 2  |
| 4.45± 0.2 | 8.22± 0.47 | 29.21±1.5  | 13.04± 0.61 | 74.77± 5.3 | 6  |
| 1.3± 0.64 | 3.95± 0.8  | 14.1±0.51  | 8.29± 0.93  | 56.48± 6.1 | 7  |
| 1.5± 0.38 | 2.8± 0.43  | 18.69±0.3  | 2.3± 1.1    | 35.42± 5.0 | 8  |
| >50       | 9.4± 0.45  | 14.4±0.62  | >50         | 57.64± 3.0 | 9  |
| 1.8± 0.2  | 2.8± 0.16  | 8.17± 0.44 | 4.6± 0.64   | 32.49± 5.0 | 10 |

| SUM149 | MDA-MB231 | T47D | MCF07 | #  |
|--------|-----------|------|-------|----|
| 1      | 6         | 0.5  | 2.6   | 1  |
| 17     | 14        | 1.5  | 7.5   | 2  |
| 16     | 9         | 2.5  | 5.7   | 6  |
| 43     | 14        | 4    | 6.7   | 7  |
| 23     | 12        | 1.9  | 15    | 8  |
| 1.1    | 6         | 3.9  | 1.1   | 9  |
| 18     | 11        | 3.9  | 7     | 10 |

Normalized Therapeutic index = (EC50 non-neoplastic cell line BJ)/(EC50 cancer cell line).

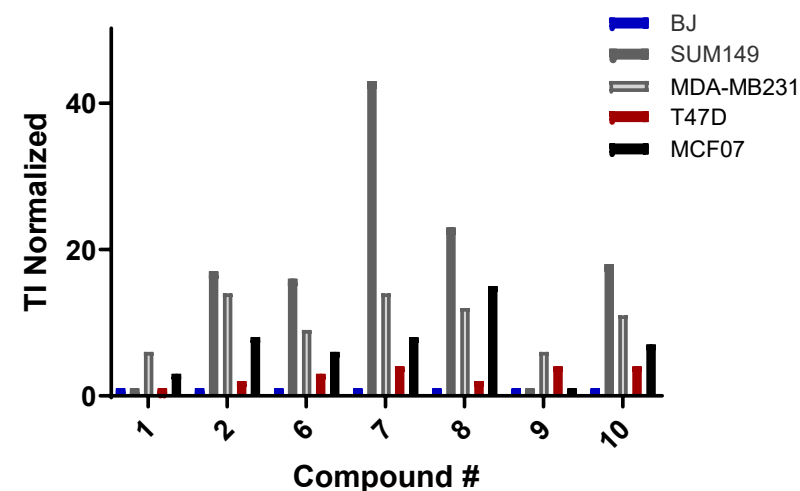

Column B SUM149  
vs. vs.  
Column A BJ  
Paired t test  
P value 0.0252  
P value summary \*  
Significantly different (P < 0.05)? Yes  
One- or two-tailed P value? Two-tailed  
t, df t=2.961, df=6  
Number of pairs 7

Column D T47D  
vs. vs.  
Column A BJ  
Paired t test  
P value 0.0068  
P value summary \*\*  
Significantly different (P < 0.05)? Yes  
One- or two-tailed P value? Two-tailed  
t, df t=4.044, df=6  
Number of pairs 7

Column C MDA-MB231  
vs. vs.  
Column A BJ  
Paired t test  
P value 0.0004  
P value summary \*\*\*  
Significantly different (P < 0.05)? Yes  
One- or two-tailed P value? Two-tailed  
t, df t=7.222, df=6  
Number of pairs 7

Column E MCF07  
vs. vs.  
Column A BJ  
Paired t test  
P value 0.0131  
P value summary \*  
Significantly different (P < 0.05)? Yes  
One- or two-tailed P value? Two-tailed  
t, df t=3.482, df=6  
Number of pairs 7

**Figure S2.** Normalized Therapeutic index and graphic corresponding to the statistical significance.



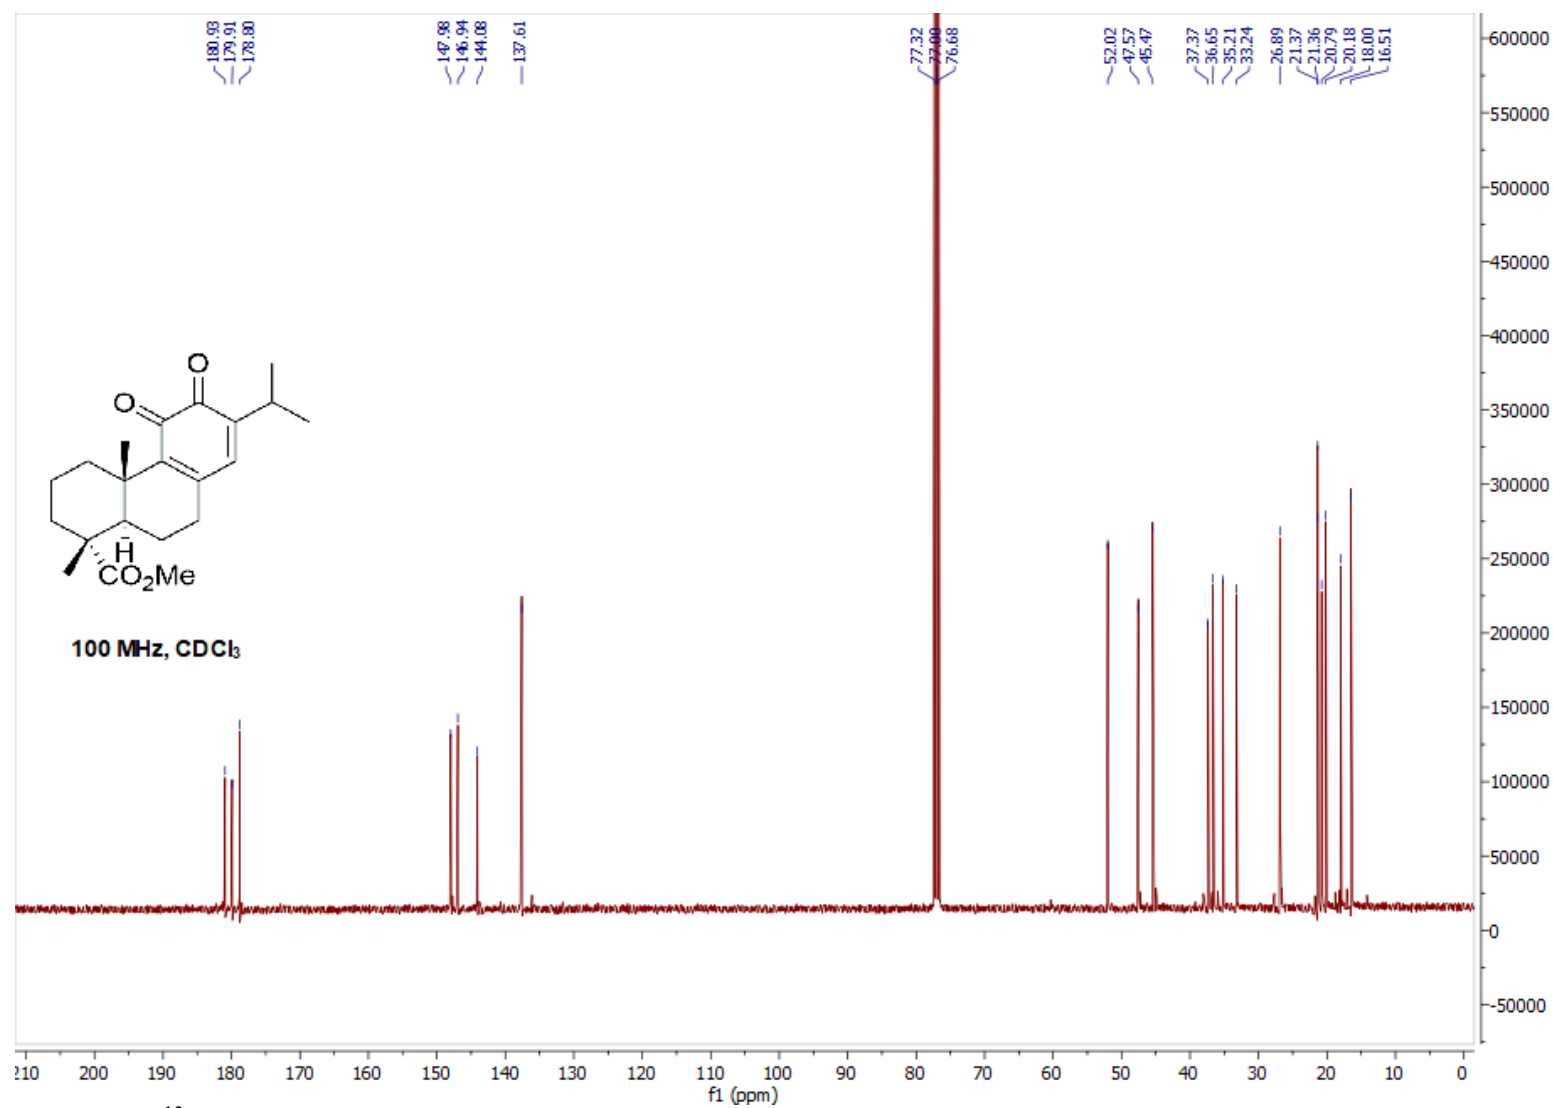

Figure S4. <sup>13</sup>C NMR spectrum of 7.

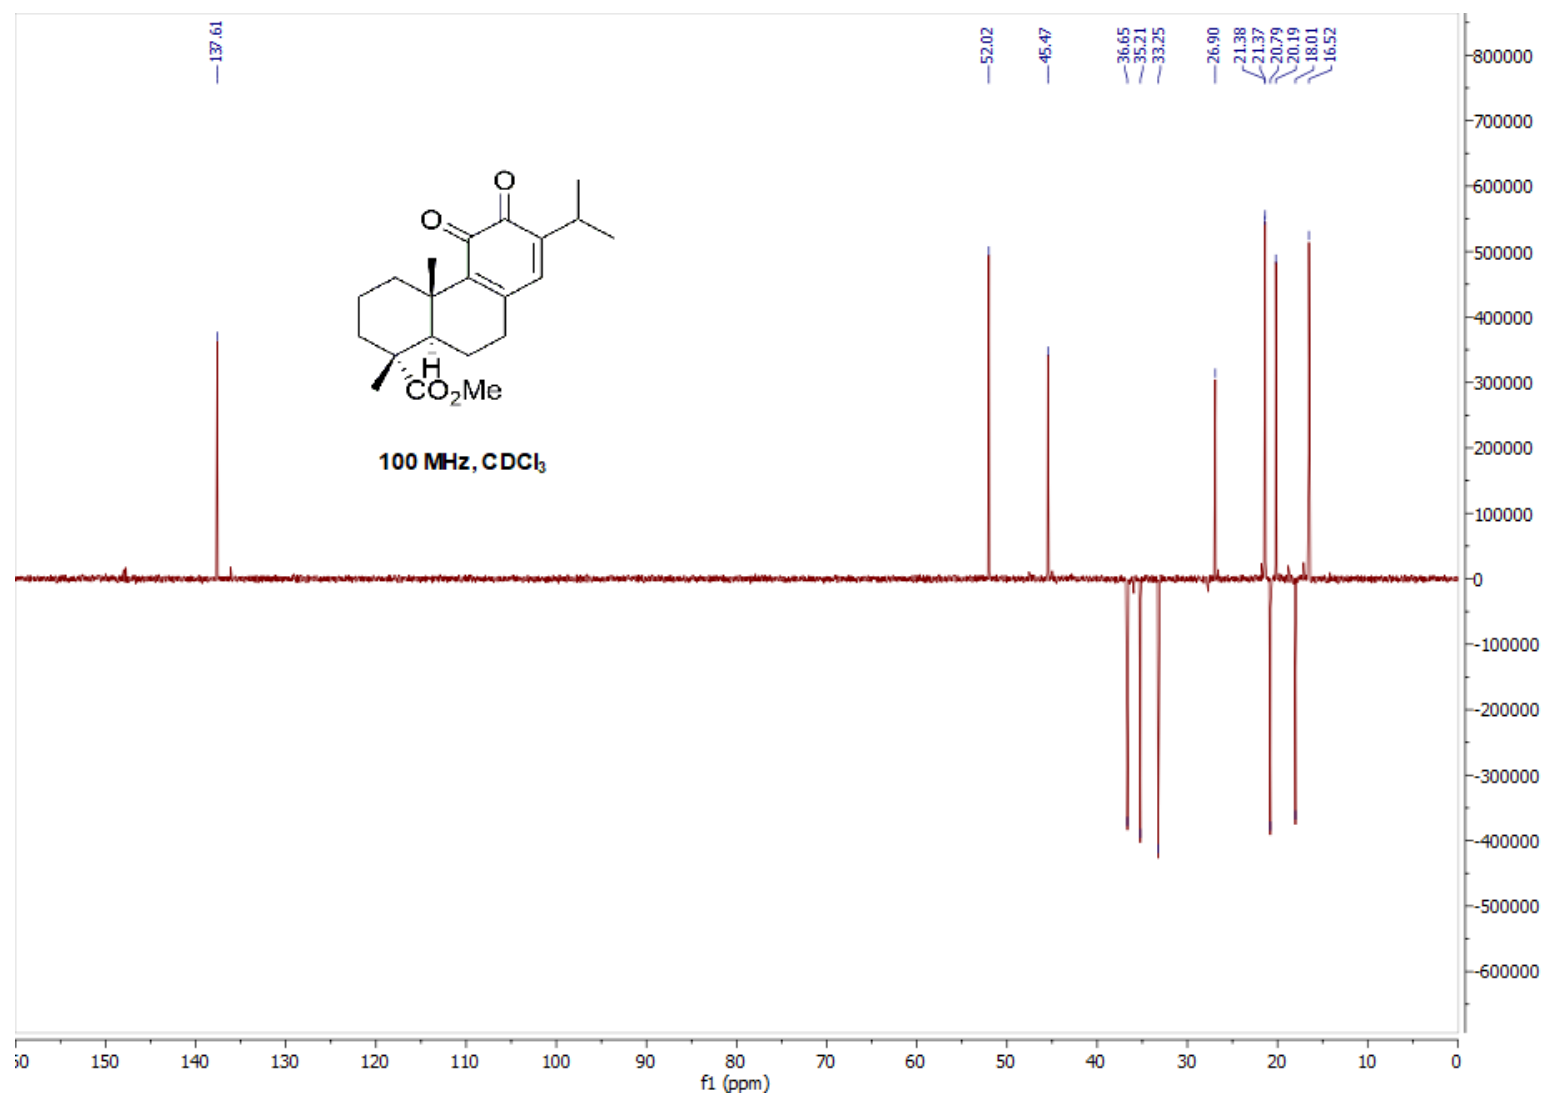

**Figure S5.** DEPT135 spectrum of 7.

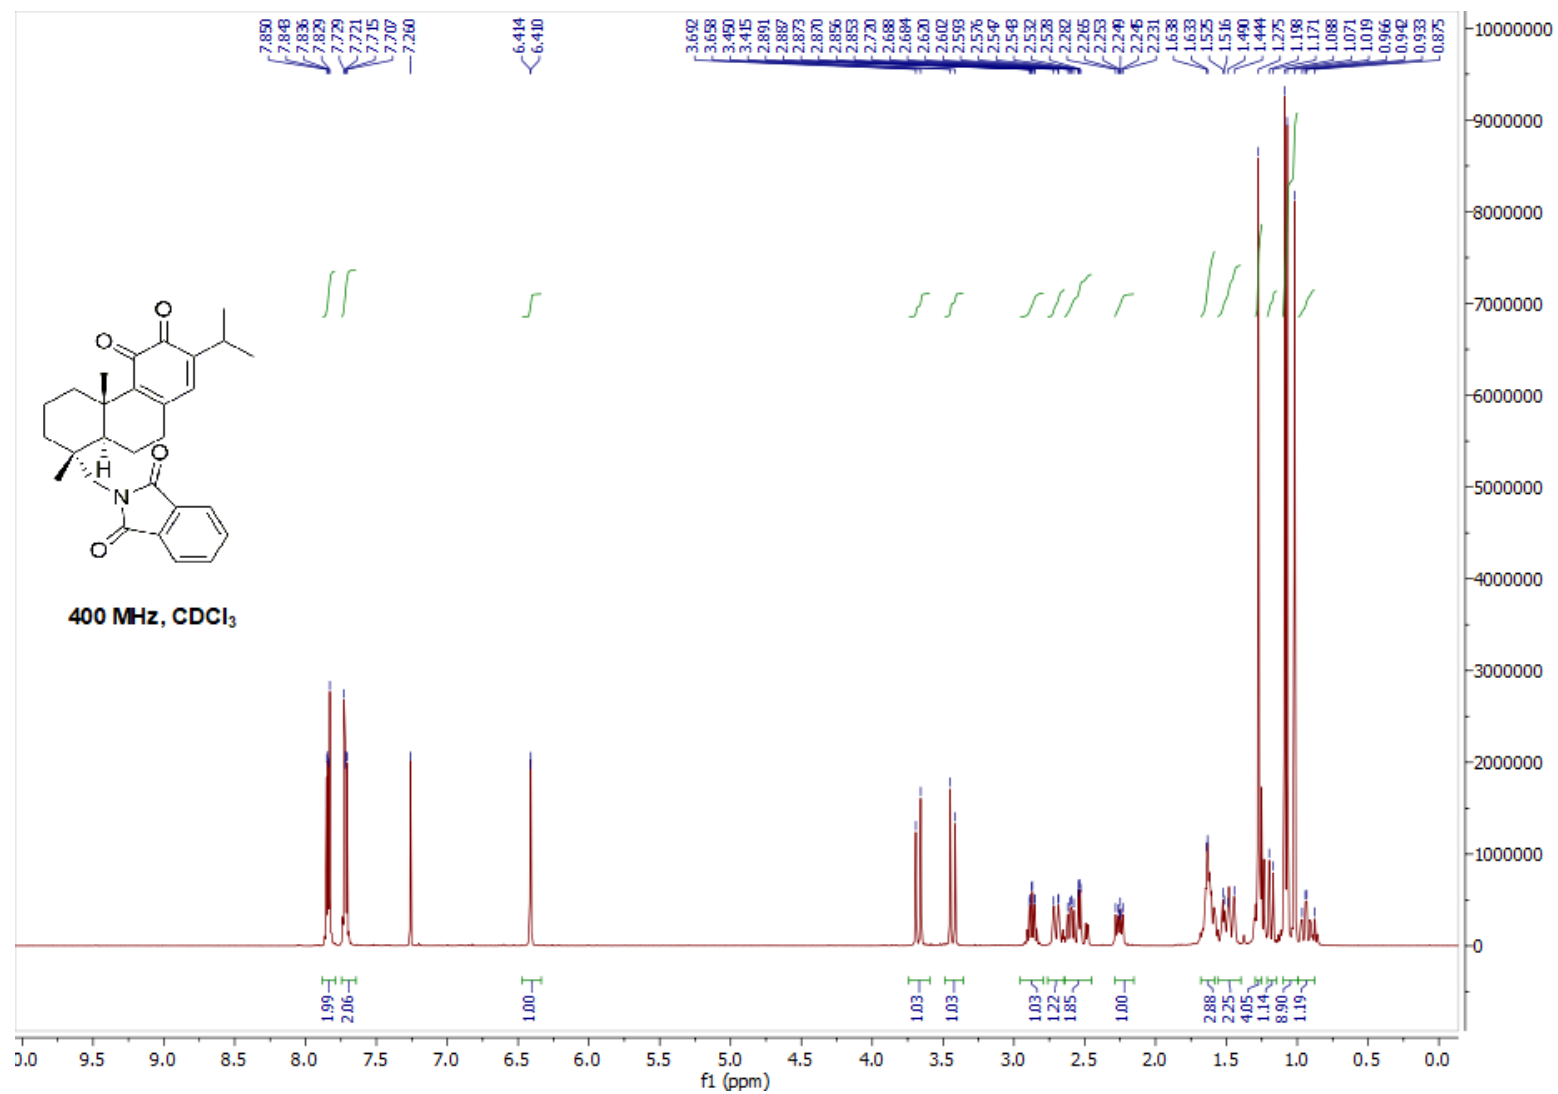

**Figure S6.** <sup>1</sup>H NMR spectrum of **8**.

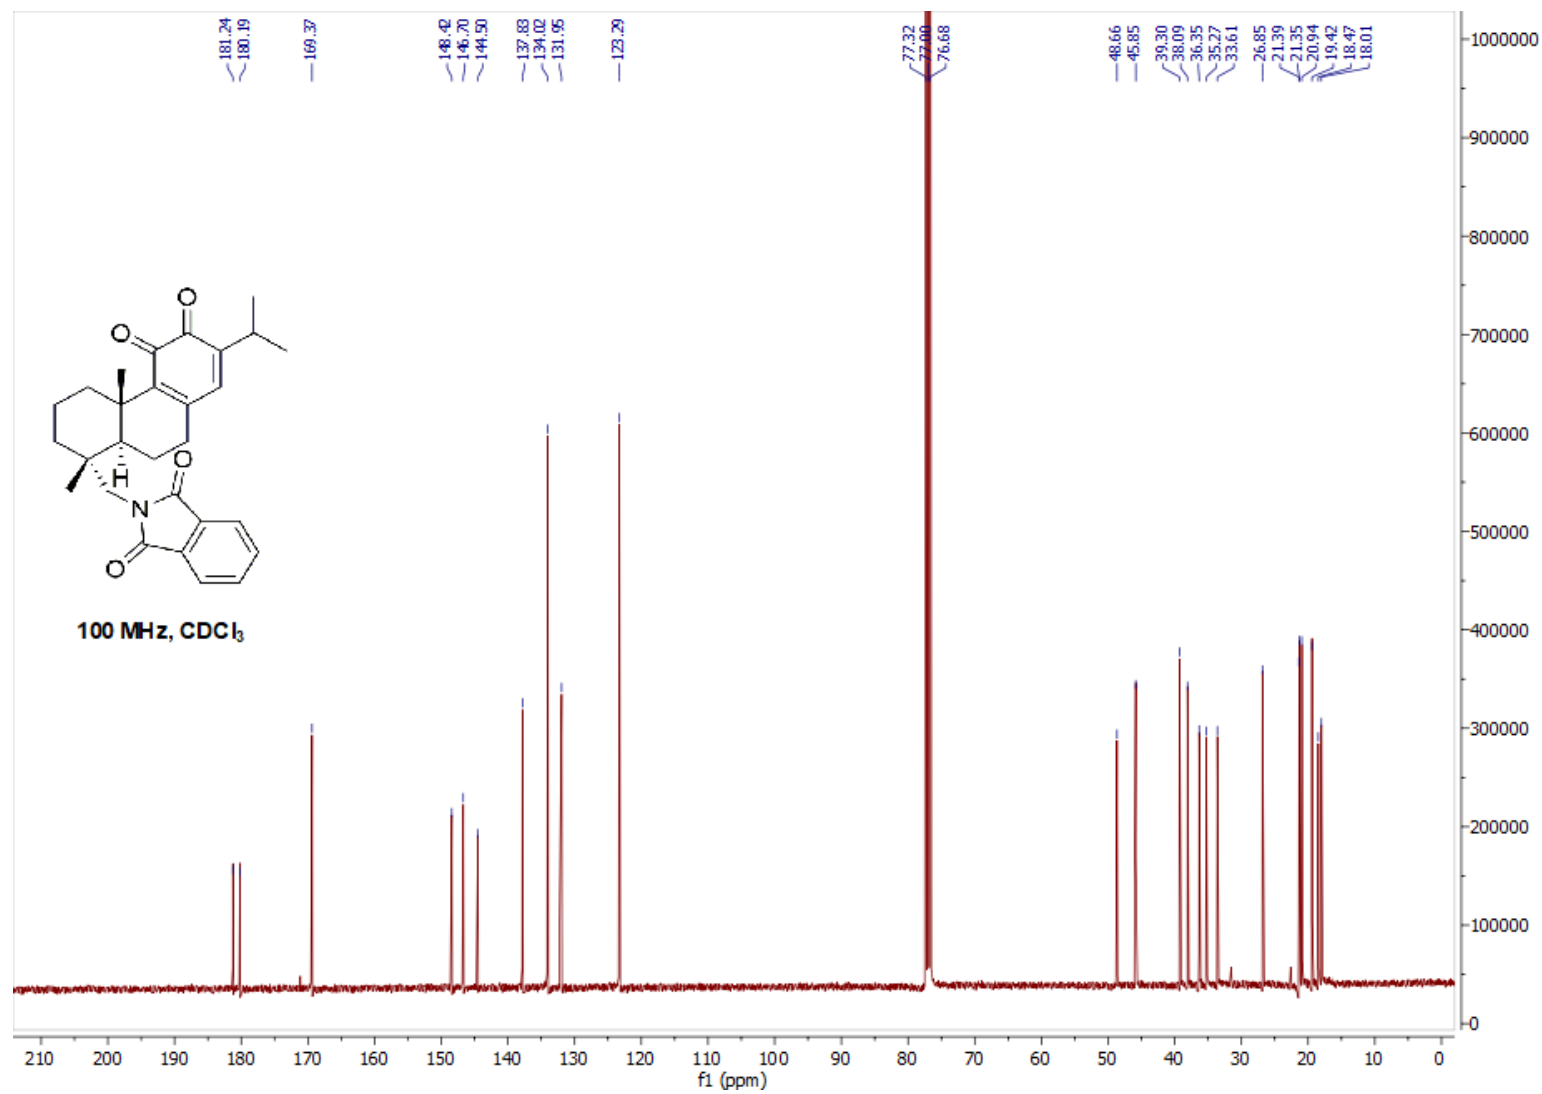

Figure S7.  $^{13}\text{C}$  NMR spectrum of **8**.



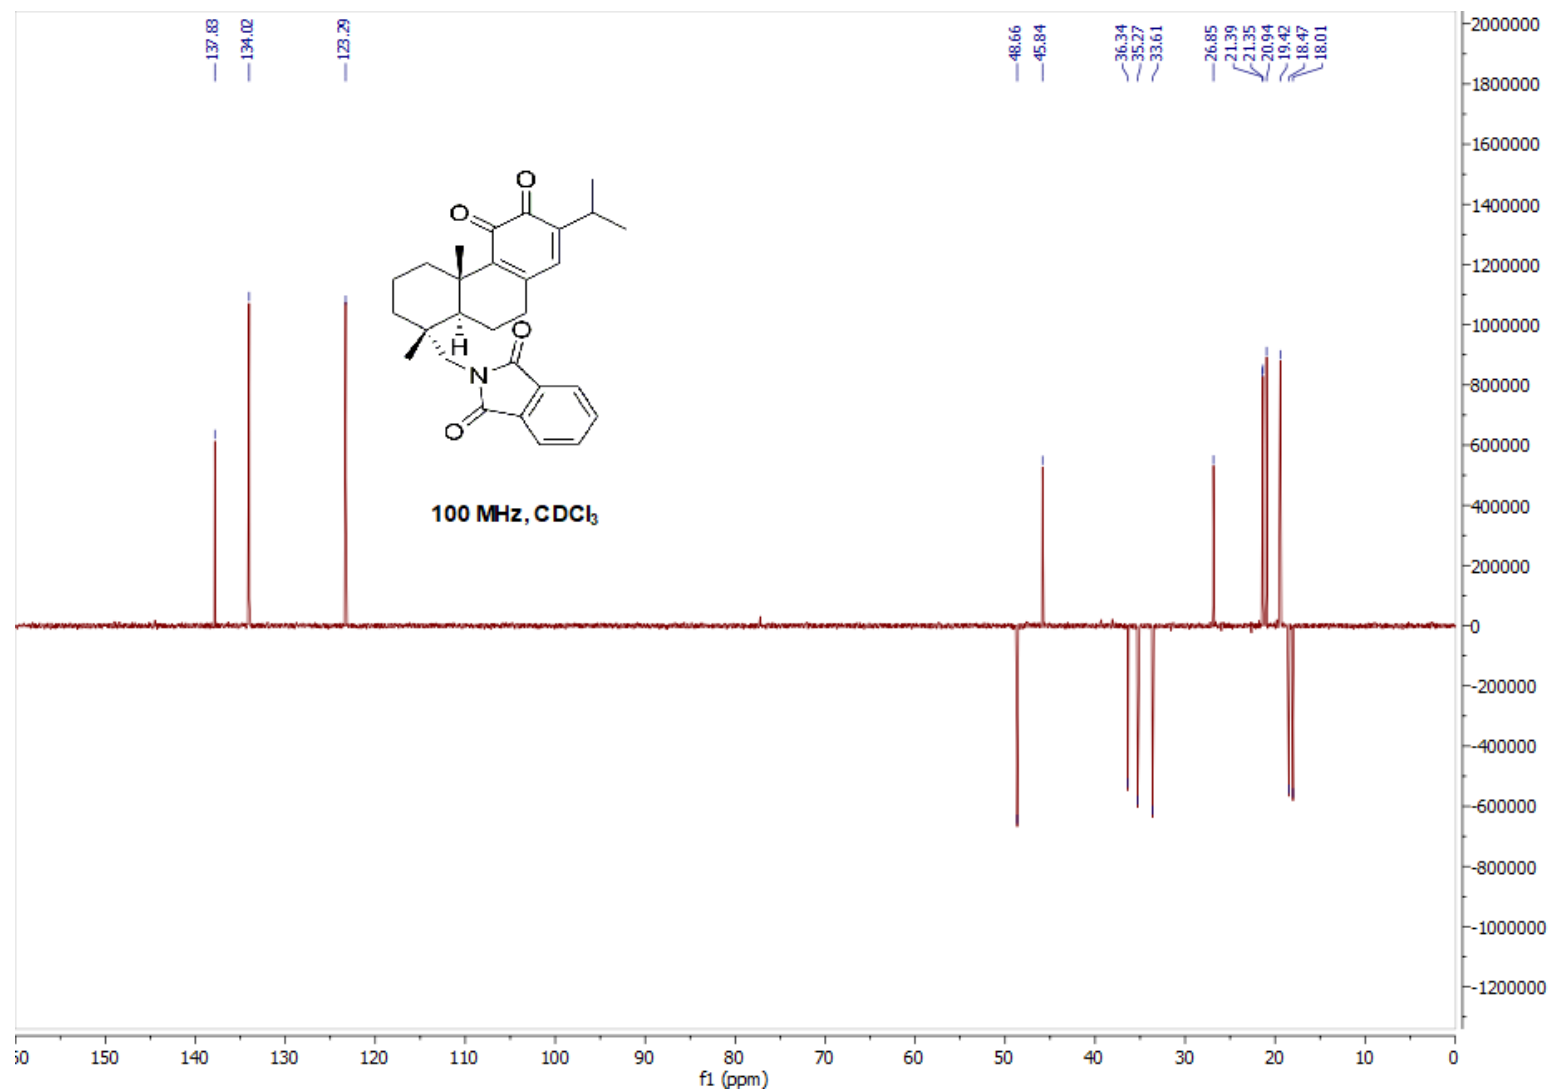

**Figure S8.** DEPT135 spectrum of **8**.

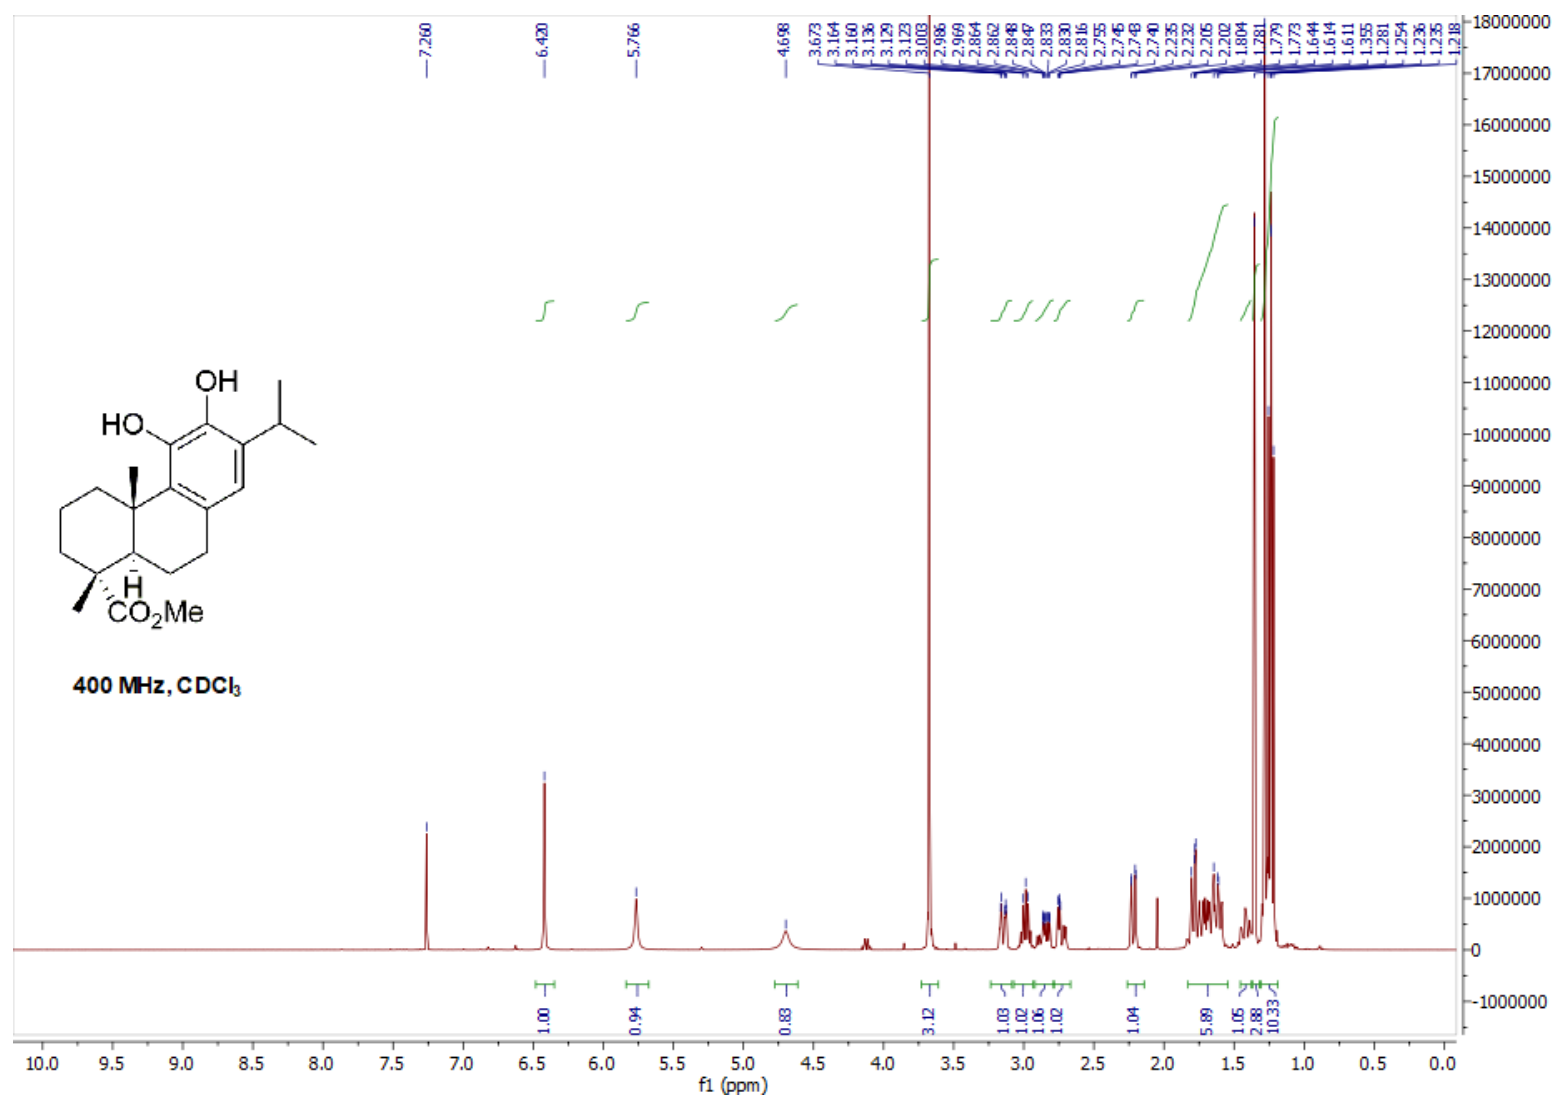

**Figure S9.** <sup>1</sup>H NMR spectrum of **9**.

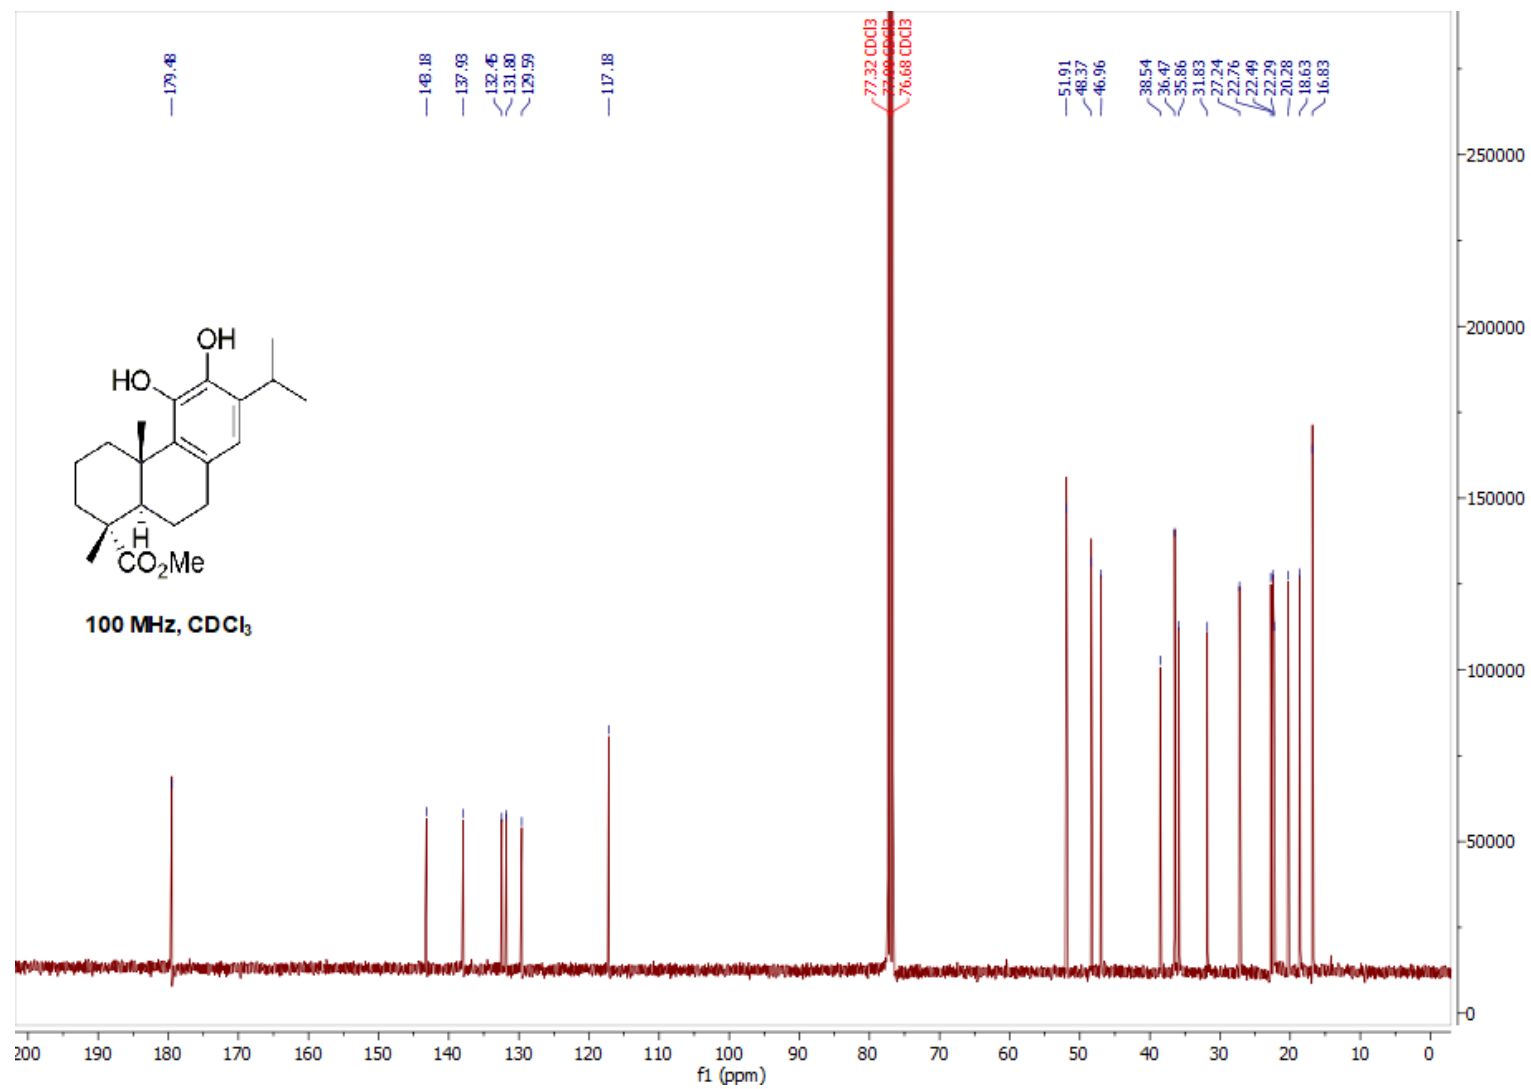

Figure S10.  $^{13}\text{C}$  NMR spectrum of **9**.

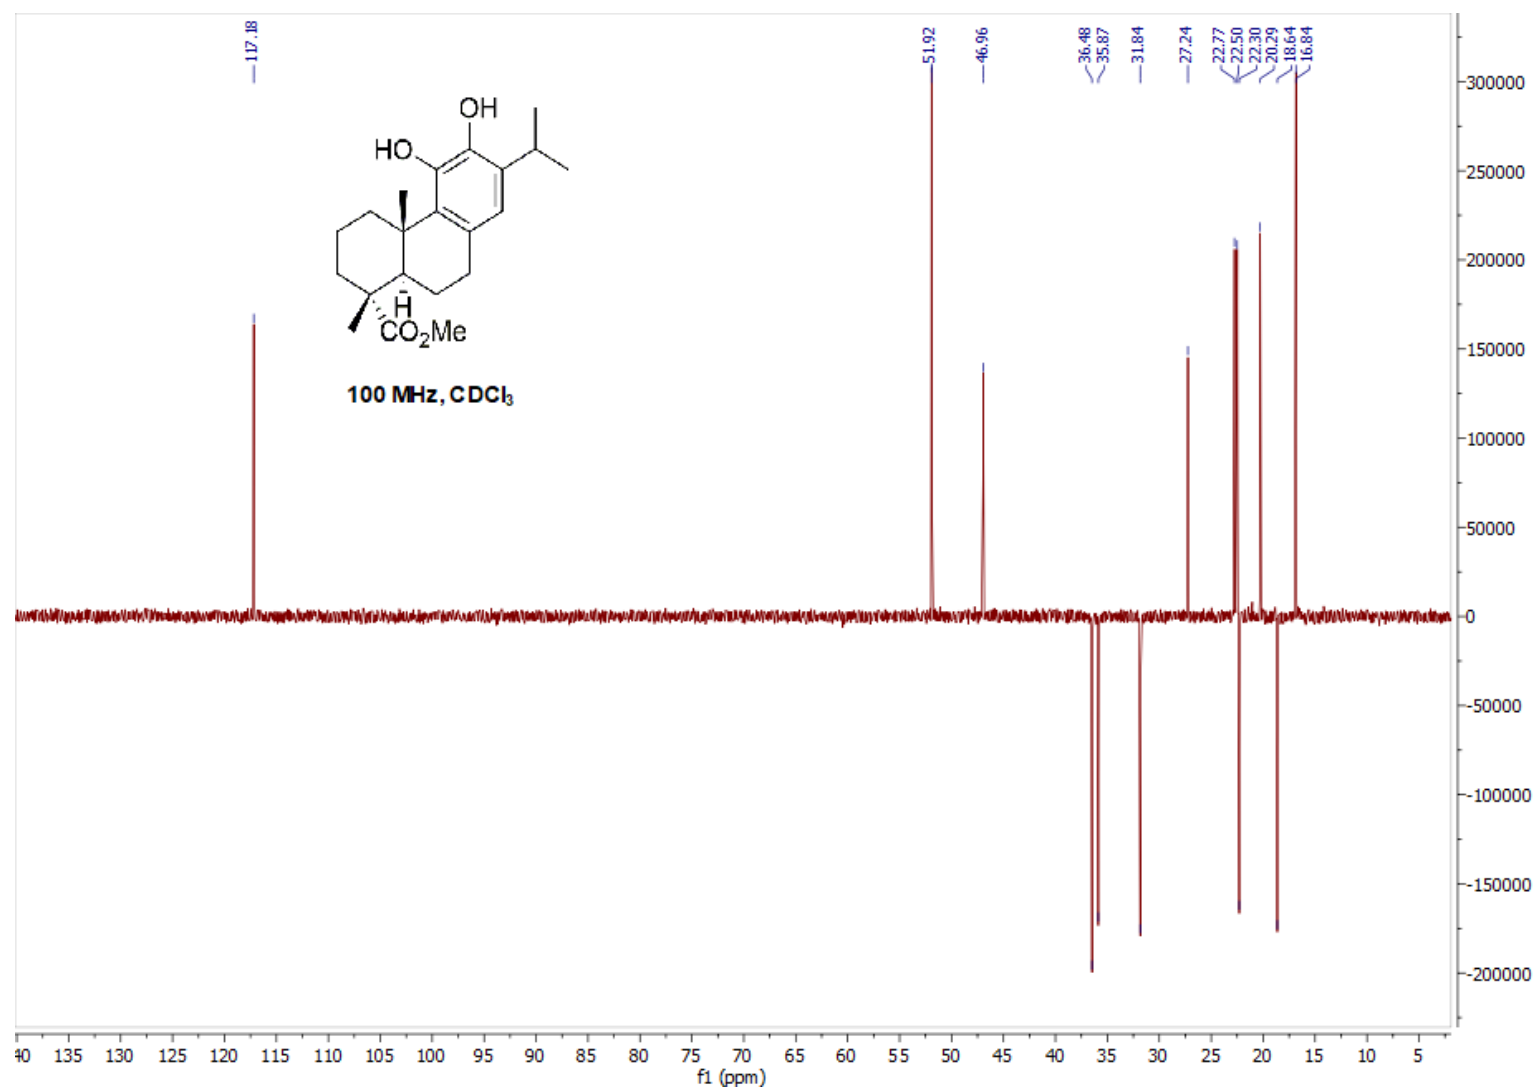

Figure S11. DEPT135 spectrum of **9**.

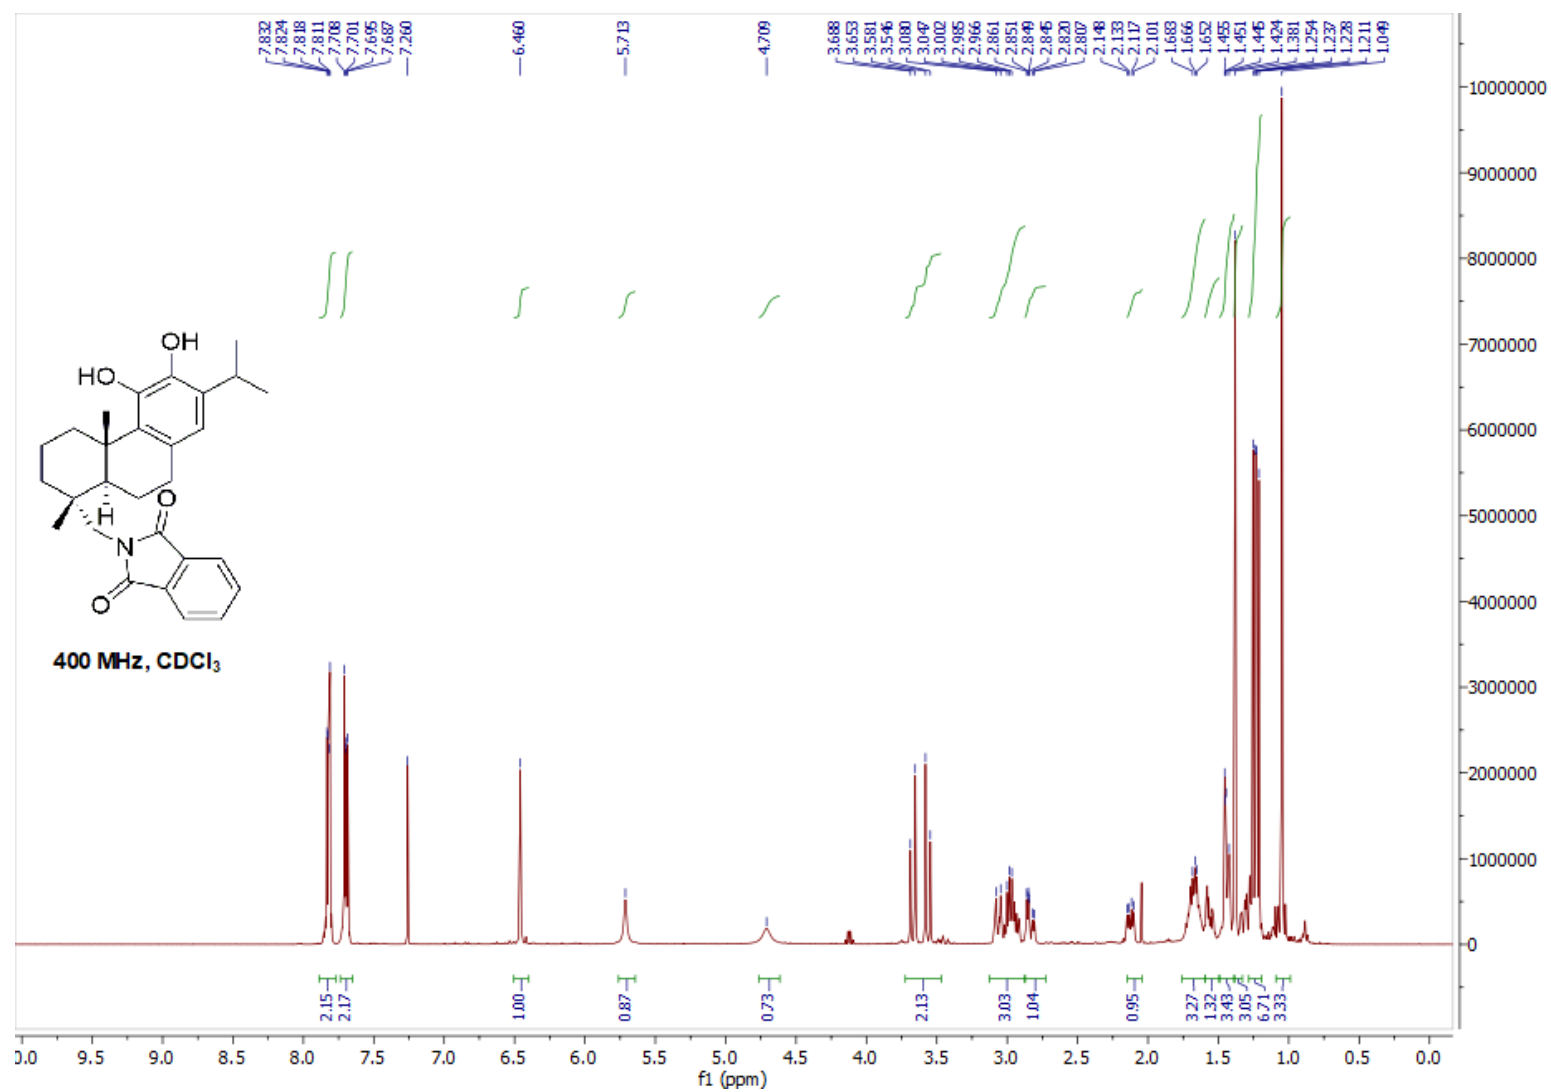

**Figure S12.** <sup>1</sup>H NMR spectrum of **10**.

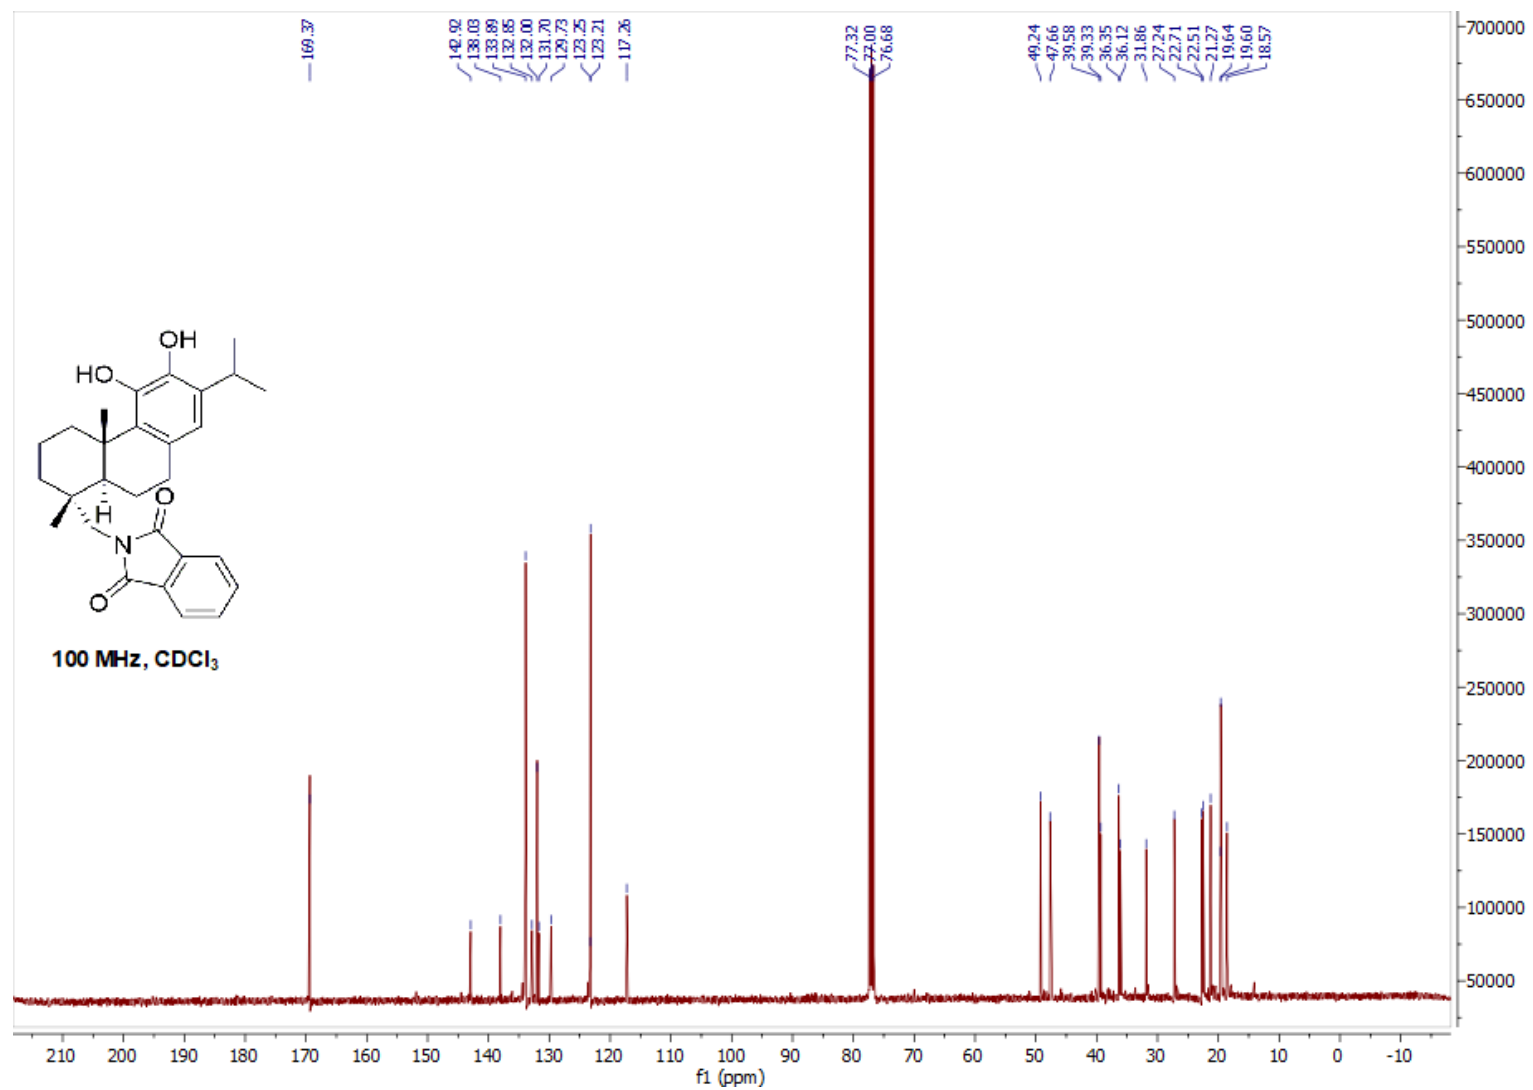

**Figure S13.**  $^{13}\text{C}$  NMR spectrum of **10**.

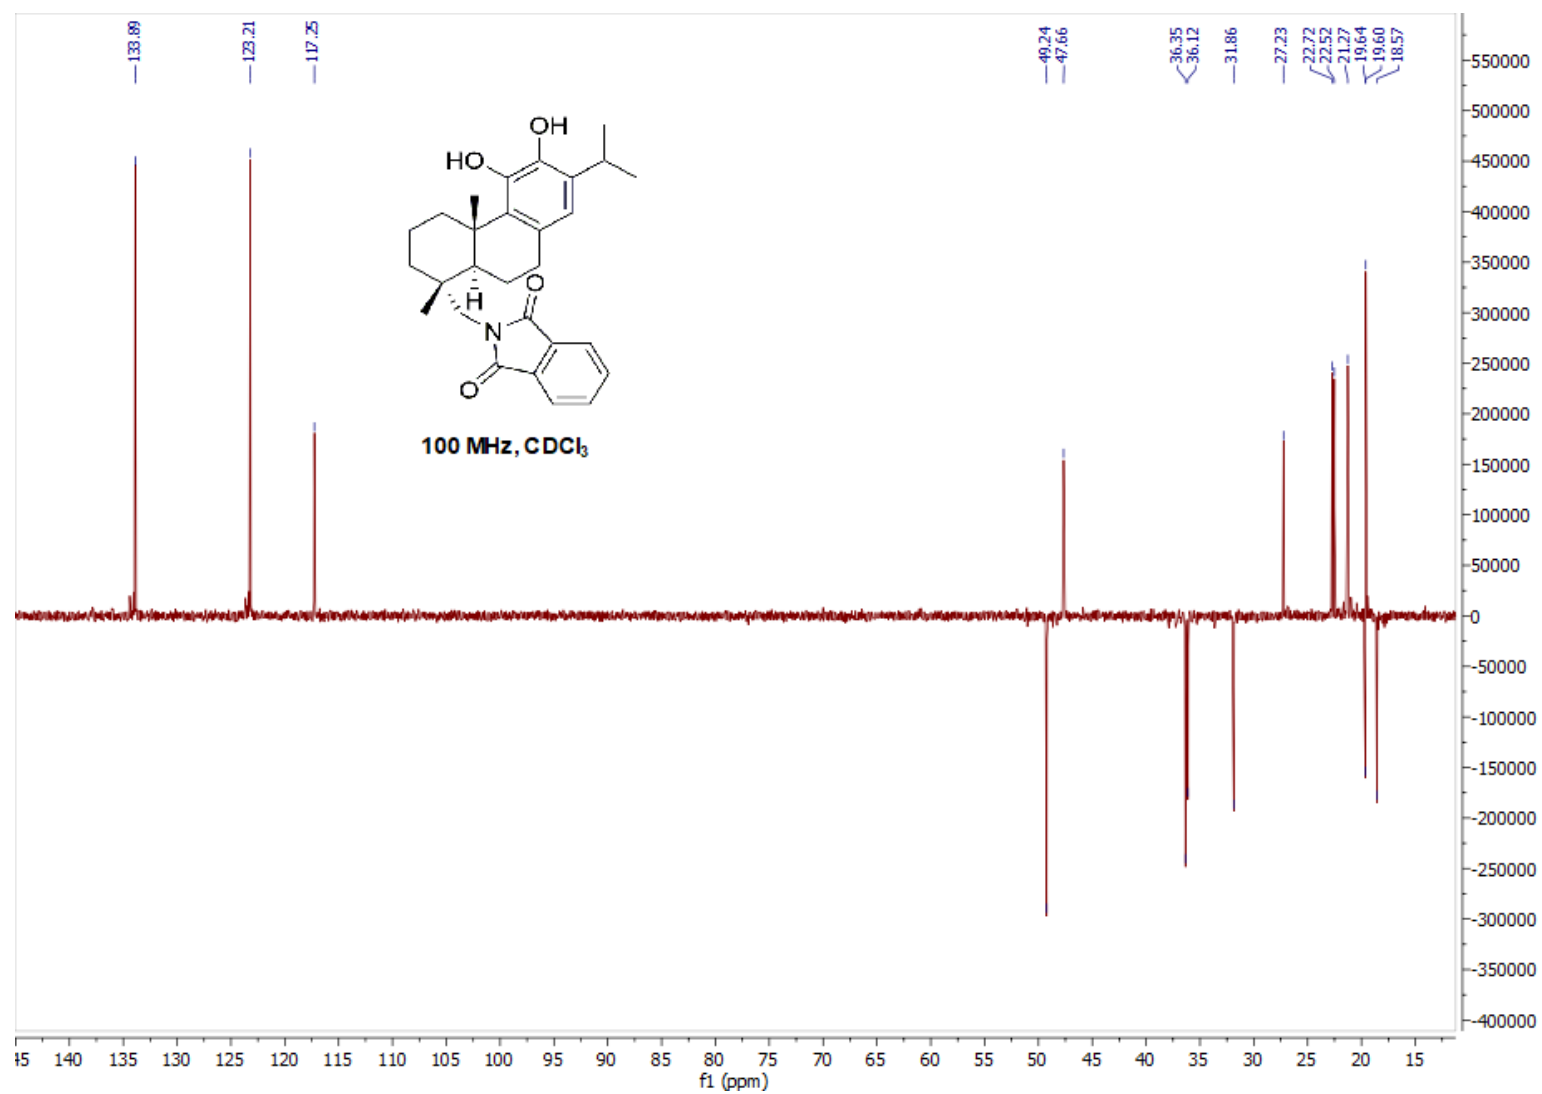

Figure S14. DEPT135 spectrum of 10.
